# Supplementary material for: Modeling Course-Based Undergraduate Research Experiences: An Agenda for Future Research and Evaluation
Source: Atypon-hosted journal article supplement (doi:10.1187/cbe.14-10-0167), 2015-03-02
Supplement: combinedsupmats.pdf [file combinedsupmats.pdf]

# Supplemental Material

*CBE—Life Sciences Education*

Corwin *et al.*

**Supplementary Table 1.** Support for outcomes of internship-based undergraduate research experiences based on a review of relevant literature. Green shading indicates *Probable* outcomes, yellow shading indicates *Possible* outcomes, and grey shading indicates *Proposed* outcomes.

| Outcome                                      | Internship-based Undergraduate Research Experience References                                                                                                                                                                                                                                                                                                                                                                                                                                                                                                        |
|----------------------------------------------|----------------------------------------------------------------------------------------------------------------------------------------------------------------------------------------------------------------------------------------------------------------------------------------------------------------------------------------------------------------------------------------------------------------------------------------------------------------------------------------------------------------------------------------------------------------------|
| Persistence in science                       | Foertsch <i>et al.</i> , 1997; Nagda 1998; Alexander 2000; Maton <i>et al.</i> , 2000; Nolan <i>et al.</i> , 2000; Estrada <i>et al.</i> , 2011; Hathaway <i>et al.</i> , 2002; Bauer & Bennett 2003; Barlow & Villaejo 2004; Lopatto 2004; Seymour <i>et al.</i> , 2004; Clewell <i>et al.</i> , 2006; Lopatto 2007; Pandya <i>et al.</i> , 2007; Russell <i>et al.</i> , 2007; Carter <i>et al.</i> , 2009; Myatt 2009; Laursen <i>et al.</i> , 2010; Craney <i>et al.</i> , 2011; Thiry & Laursen 2011; Adedokun <i>et al.</i> , 2012; Eagan <i>et al.</i> , 2013 |
| Career clarification                         | Sabatini 1997; Alexander 2000; Maton <i>et al.</i> , 2000; Nolan <i>et al.</i> , 2000; Ward 2002; Bauer & Bennett 2003; Ishiyama 2007; Lopatto 2004; Seymour <i>et al.</i> , 2004; Lopatto 2007; Russell <i>et al.</i> , 2007; Myatt 2009; Laursen <i>et al.</i> , 2010; Craney <i>et al.</i> , 2011; Thiry & Laursen 2011; Adedokun <i>et al.</i> , 2012                                                                                                                                                                                                            |
| Increased analytical skills                  | Sabatini 1997; Kardash 2000; Maton <i>et al.</i> , 2000; Ward 2002; Zydney <i>et al.</i> , 2002; Bauer & Bennett 2003; Lopatto 2004; Seymour <i>et al.</i> , 2004; Lopatto 2007; Laursen <i>et al.</i> , 2010; Craney <i>et al.</i> , 2011; Thiry & Laursen 2011; Thiry <i>et al.</i> , 2012                                                                                                                                                                                                                                                                         |
| Increased self-efficacy                      | Foertsch <i>et al.</i> , 1997; Alexander 2000; Nolan <i>et al.</i> , 2000; Ward 2002; Barlow & Villarejo 2004; Lopatto 2004; Lopatto 2007; Russell <i>et al.</i> , 2007; Carter <i>et al.</i> , 2009; Myatt 2009; Laursen <i>et al.</i> , 2010; Thiry & Laursen 2011; Thiry <i>et al.</i> , 2012                                                                                                                                                                                                                                                                     |
| Increased communication skills               | Sabatini 1997; Kardash 2000; Ward 2002; Zydney <i>et al.</i> , 2002; Bauer & Bennett 2003; Lopatto 2004; Seymour <i>et al.</i> , 2004; Lopatto 2007; Myatt 2009; Laursen <i>et al.</i> , 2010; Craney <i>et al.</i> , 2011                                                                                                                                                                                                                                                                                                                                           |
| Expanded professional network                | Foertsch <i>et al.</i> , 1997; Sabatini 1997; Maton <i>et al.</i> , 2000; Nolan <i>et al.</i> , 2000; Hathaway <i>et al.</i> , 2002; Ishiyama 2007; Seymour <i>et al.</i> , 2004; Clewell <i>et al.</i> , 2006; Laursen <i>et al.</i> , 2010; Thiry & Laursen 2011; Adedokun <i>et al.</i> , 2012                                                                                                                                                                                                                                                                    |
| External validation from a science community | Maton <i>et al.</i> , 2000; Nolan <i>et al.</i> , 2000; Hathaway <i>et al.</i> , 2002; Ward 2002; Ishiyama 2007; Laursen <i>et al.</i> , 2010; Craney <i>et al.</i> , 2011; Adedokun <i>et al.</i> , 2012; Thiry <i>et al.</i> , 2012                                                                                                                                                                                                                                                                                                                                |
| Increased access to faculty interaction      | Sabatini 1997; Ryder <i>et al.</i> , 1999; Alexander 2000; Maton <i>et al.</i> , 2000; Barlow & Villarejo 2004; Ishiyama 2007; Seymour <i>et al.</i> , 2004; Estrada <i>et al.</i> , 2011; Thiry & Laursen 2011; Eagan <i>et al.</i> , 2013                                                                                                                                                                                                                                                                                                                          |
| Increased content knowledge                  | Sabatini 1997; Nagda 1998; Kardash 2000; Seymour <i>et al.</i> , 2004; Myatt 2009; Laursen <i>et al.</i> , 2010; Craney <i>et al.</i> , 2011; Thiry & Laursen 2011                                                                                                                                                                                                                                                                                                                                                                                                   |

|                 | <b>Outcome</b>                                     | <b>Internship-based Undergraduate Research Experience References</b>                                                                                                      |
|-----------------|----------------------------------------------------|---------------------------------------------------------------------------------------------------------------------------------------------------------------------------|
| <b>Probable</b> | Increased tolerance for obstacles                  | Alexander 2000; Ward 2002; Lopatto 2004; Seymour <i>et al.</i> , 2004; Laursen <i>et al.</i> , 2010; Thiry & Laursen 2011; Thiry <i>et al.</i> , 2012                     |
|                 | Increased access to mentoring functions            | Alexander 2000; Maton <i>et al.</i> , 2000; Barlow & Villarejo 2004; Seymour <i>et al.</i> , 2004; Laursen <i>et al.</i> , 2010; Thiry & Laursen 2011                     |
|                 | Enhanced science identity                          | Seymour <i>et al.</i> , 2004; Laursen <i>et al.</i> , 2010; Estrada <i>et al.</i> , 2011; Thiry & Laursen 2011; Adedokun <i>et al.</i> , 2012; Thiry <i>et al.</i> , 2012 |
|                 | Increased technical skills                         | Sabatini 1997; Kardash 2000; Seymour <i>et al.</i> , 2004; Craney <i>et al.</i> , 2011; Thiry & Laursen 2011                                                              |
|                 | Increased socio-emotional support                  | Alexander 2000; Seymour <i>et al.</i> , 2004; Clewell <i>et al.</i> , 2006; Craney <i>et al.</i> , 2011; Thiry & Laursen 2011                                             |
|                 | Increased sense of belonging to a larger community | Alexander 2000; Maton <i>et al.</i> , 2000; Barlow & Villarejo 2004; Lopatto 2004; Lopatto 2007                                                                           |
|                 | Increased motivation in science                    | Estrada <i>et al.</i> , 2011; Ward 2002; Seymour <i>et al.</i> , 2004; Lopatto 2007; Thiry and Laursen 2011                                                               |
|                 | Enhanced understanding of the nature of science    | Ward 2002; Seymour <i>et al.</i> , 2004; Russell <i>et al.</i> , 2007                                                                                                     |
| <b>Possible</b> | Increased positive interaction with peers          | Alexander 2000; Seymour <i>et al.</i> , 2004                                                                                                                              |
| <b>Proposed</b> | Increased collaboration skills                     | Seymour <i>et al.</i> , 2004                                                                                                                                              |
|                 | Increased student ownership                        | Thiry <i>et al.</i> , 2012                                                                                                                                                |

## References

- Adedokun OA, Zhang D, Parker LC, Bessenbacher A, Chilcress A, Burgess WD (2012) Towards an understanding of the processes of the effects of undergraduate research experiences on students' aspiration for research careers and graduate education. *J Coll Sci Teach* 42, 82-91.
- Alexander BB, Foertsch J, Daffinrud S, Tapia R (2000) The Spend a Summer with a Scientist (SaS) Program at Rice University: A Study of Program Outcomes and Essential Elements 1991-1997. *CUR Quarterly* 20, 127-133.
- Barlow AE, Villarejo M (2004) Making a difference for minorities: Evaluation of an educational enrichment program. *J Res Sci Teach* 41, 861-881.
- Bauer KW, Bennett JS (2003) Alumni perceptions used to assess undergraduate research experience. *J Higher Educ* 74, 210-230.
- Carter F, Mandell M, Maton K (2009) The influence of on-campus academic year undergraduate research on STEM Ph.D. Outcomes: Evidence from the Meyerhoff scholarship program. *Educ Eval Policy Anal* 31, 441-462.
- Clewell BC, de Cohen C, Tsui L, Deterding N (2006) Revitalizing the Nation's talent pool in STEM. [http://www.urban.org/UploadedPDF/311299\\_revitalizing\\_stem.pdf](http://www.urban.org/UploadedPDF/311299_revitalizing_stem.pdf) (accessed September 2014)
- Craney C, McKay T, Mazzeo A, Morris J, Prigodich C, de Groot R (2011) Cross-discipline perceptions of undergraduate research experience. *J Higher Educ* 82, 92-113.
- Eagan MK, Hurtado S, Chang MJ, Garcia GA, Herrera FA, Garibay JC (2013) Making a Difference in Science Education The Impact of Undergraduate Research Programs. *Am Educ Res J* 50, 683-713.
- Estrada M, Woodcock A, Hernandez PR, Schultz P (2011) Toward a model of social influence that explains minority student integration into the scientific community. *J Educ Psychol* 103, 206.
- Foertsch JA, Alexander BB, Penberthy DL (1997) Evaluation of the UW-Madison's summer undergraduate research programs: Final report. Madison: University of Wisconsin- Madison LEAD Center.
- Hathaway RS, Nagda BRA, Gregerman SR (2002) The relationship of undergraduate research participation to graduate and professional education pursuit: an empirical study. *J Coll Stud Dev* 43, 614-31.

Ishiyama J (2007) Expectations and perceptions of undergraduate research mentoring: Comparing first generation, low income white/Caucasian and African American students. *Coll Stud J* 41, 540.

Kardash CM (2000) Evaluation of undergraduate research experience: Perceptions of undergraduate interns and their faculty mentors. *J Educ Psychol* 92, 191.

Laursen S, Hunter AB, Seymour E, Thiry H, Melton G (2010). *Undergraduate Research in the Sciences: Engaging Students in Real Science*, San Francisco: Jossey-Bass.

Lopatto D (2004) Survey of undergraduate research experiences (SURE): first findings. *Cell Biol Educ* 3, 270-277.

Lopatto D (2007) Undergraduate research experiences support science career decisions and active learning. *CBE Life Sci Educ* 6, 297-306.

Maton KI, Hrabowski FA, Schmitt CL (2000) African American college students excelling in the sciences: College and postcollege outcomes in the Meyerhoff Scholars Program. *J Res Sci Teach* 37, 629-654.

Myatt P (2009) Student perceptions of the undergraduate research experience: What do they think they really gain and how much influence does it have? In: *Proceedings of The Australian Conference on Science and Mathematics Education (formerly UniServe Science Conference)*.

Nagda BA, Gregerman SR, Jonides J, von Hippel W, Lerner JS (1998) Undergraduate student-faculty research partnerships affect student retention. *Rev High Ed* 22, 55-72.

Nolan D (2000) The Mills College Summer Mathematics Institute & The Berkeley Summer Institute for the Mathematical Sciences. In: *Proceedings of the Conference on Summer Undergraduate Mathematics Research Programs*. American Mathematical Society.

Pandya RE, Henderson S, Anthes RA, & Johnson RM (2007) BEST practices for broadening participation in the geosciences: Strategies from the UCAR Significant Opportunities in Atmospheric Research and Science (SOARS®) Program. *J Geosci Educa* 55, 500.

Russell SH, Hancock MP, McCullough J (2007) Benefits of undergraduate research experiences. *Science* 316, 548-549.

Ryder J, Leach J, Driver R (1999) Undergraduate science students' images of science. *J Res Sci Teach* 36, 201-219.

Sabatini DA (1997) Teaching and research synergism: The undergraduate research experience. *J Prof Iss Eng Educ* 123, 98-102.

Seymour E, Hunter AB, Laursen SL, DeAntoni T (2004) Establishing the benefits of research experiences for undergraduates in the sciences: First findings from a three-year study. *Sci Educ* 88, 493-534.

Thiry H, Weston TJ, Laursen SL, Hunter AB (2012) The benefits of multi-year research experiences: differences in novice and experienced students' reported gains from undergraduate research. *CBE Life Sci Educ* 11, 260-272.

Thiry H, Laursen SL (2011) The role of student-advisor interactions in apprenticing undergraduate researchers into a scientific community of practice. *J Sci Educ Technol* 20, 771-784.

Ward C, Bennett JS, Bauer KW (2002). Content analysis of undergraduate research student evaluations.

<https://www.sarc.miami.edu/ReinventionCenter/Public/assets/files/contentAnalysis.pdf> (accessed September 2014)

Zydney AL, Bennett JS, Shahid A, Bauer KW (2002) Impact of undergraduate research experience in engineering. *J Eng Educ* 91, 151-157.
